# Supplementary material for: Islet-autoreactive CD4+ T cells are linked with response to alefacept in type 1 diabetes
Source: PubMed Central journal article supplement (PMC10721267; doi:10.1172/jci.insight.167881), 2023-11-08
Supplement: jciinsight-8-167881-s157.pdf [file jciinsight-8-167881-s157.pdf]

# Supplemental Figure 1

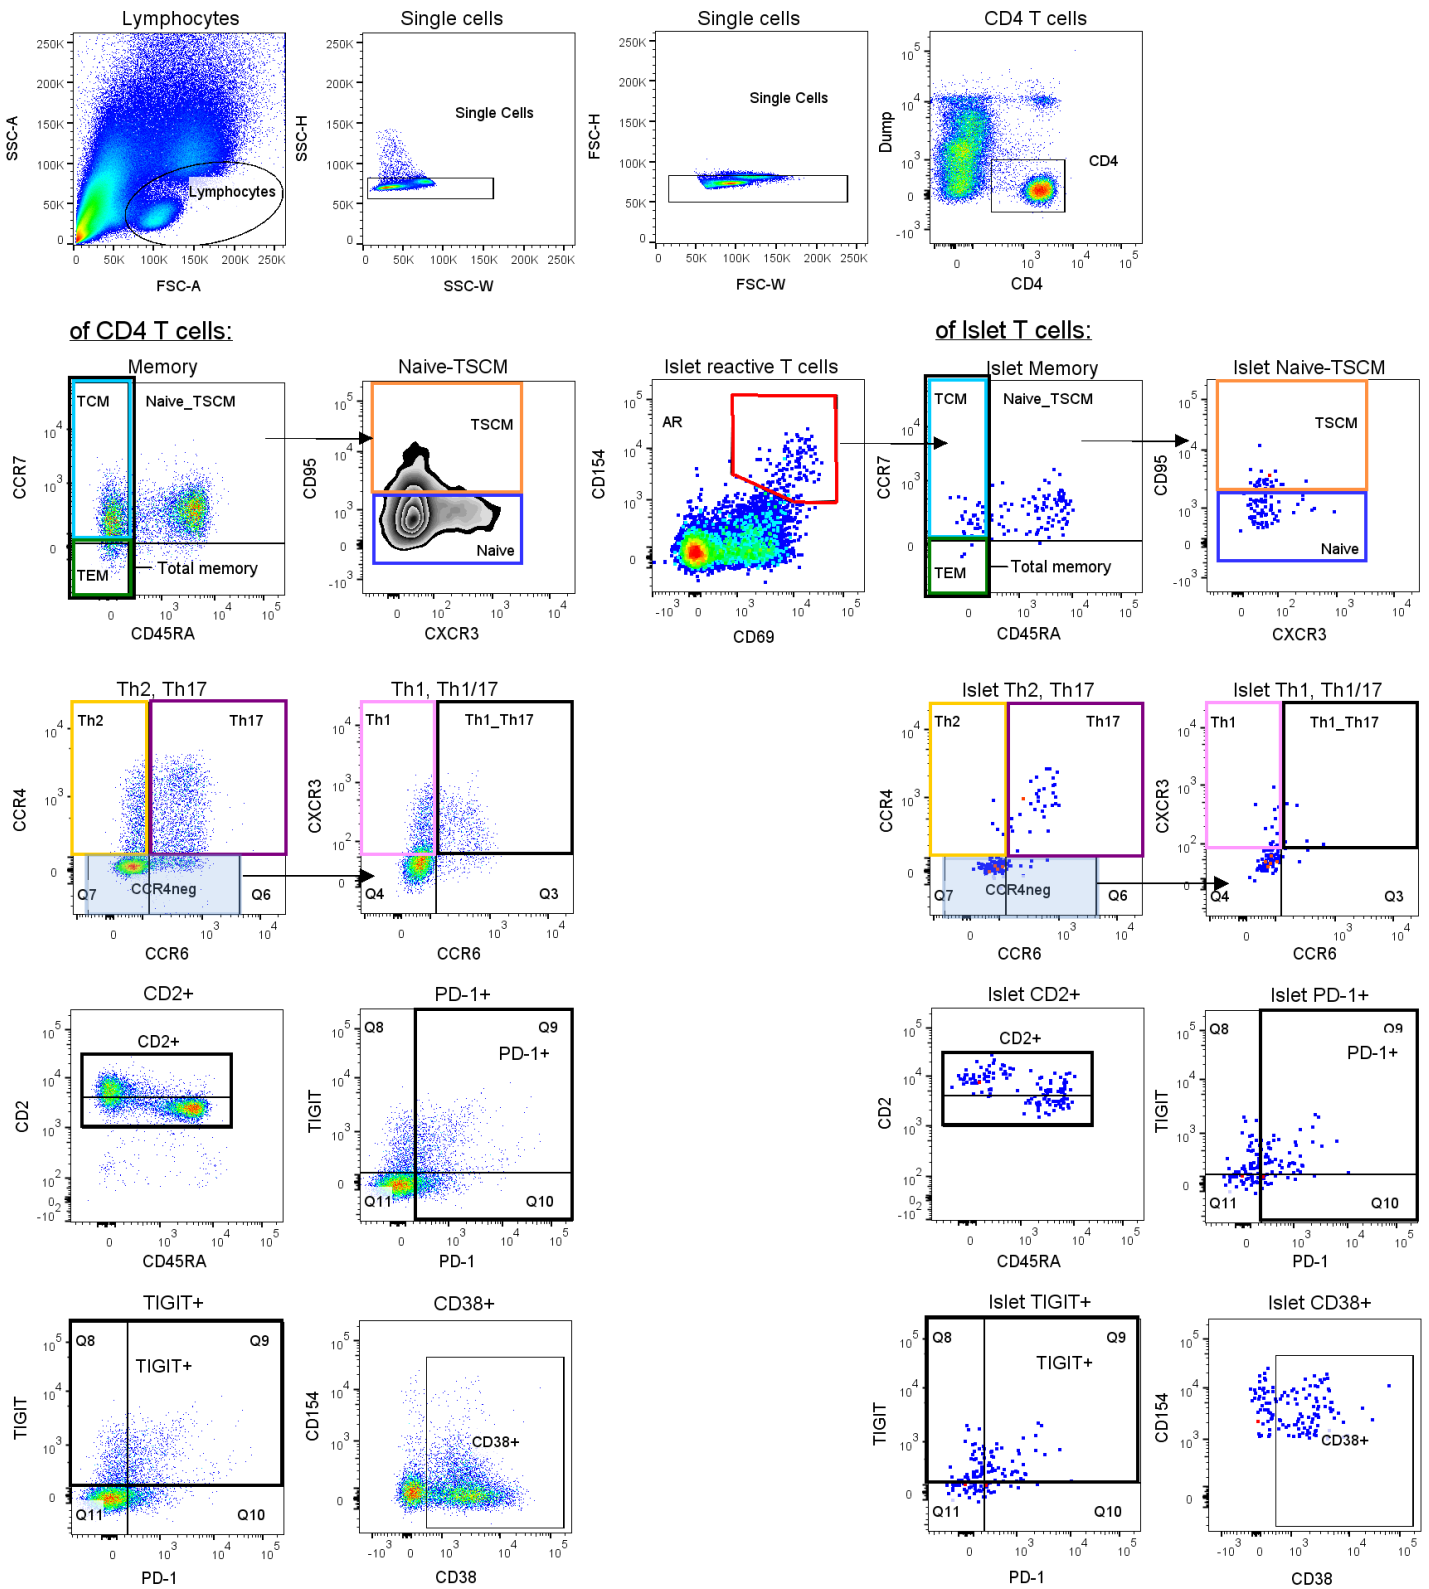

**Supplemental Figure 1.** Flow cytometric gating strategy for antigen reactive CD4 T cell populations in a PBMC sample stimulated for 14h with islet peptides (subject T1DAL-243767). Gates for naive and memory populations, T cell helper subsets, activation and inhibitory receptors were set using total CD4 T cells and were then applied to the islet antigen reactive population.

# Supplemental Figure 2

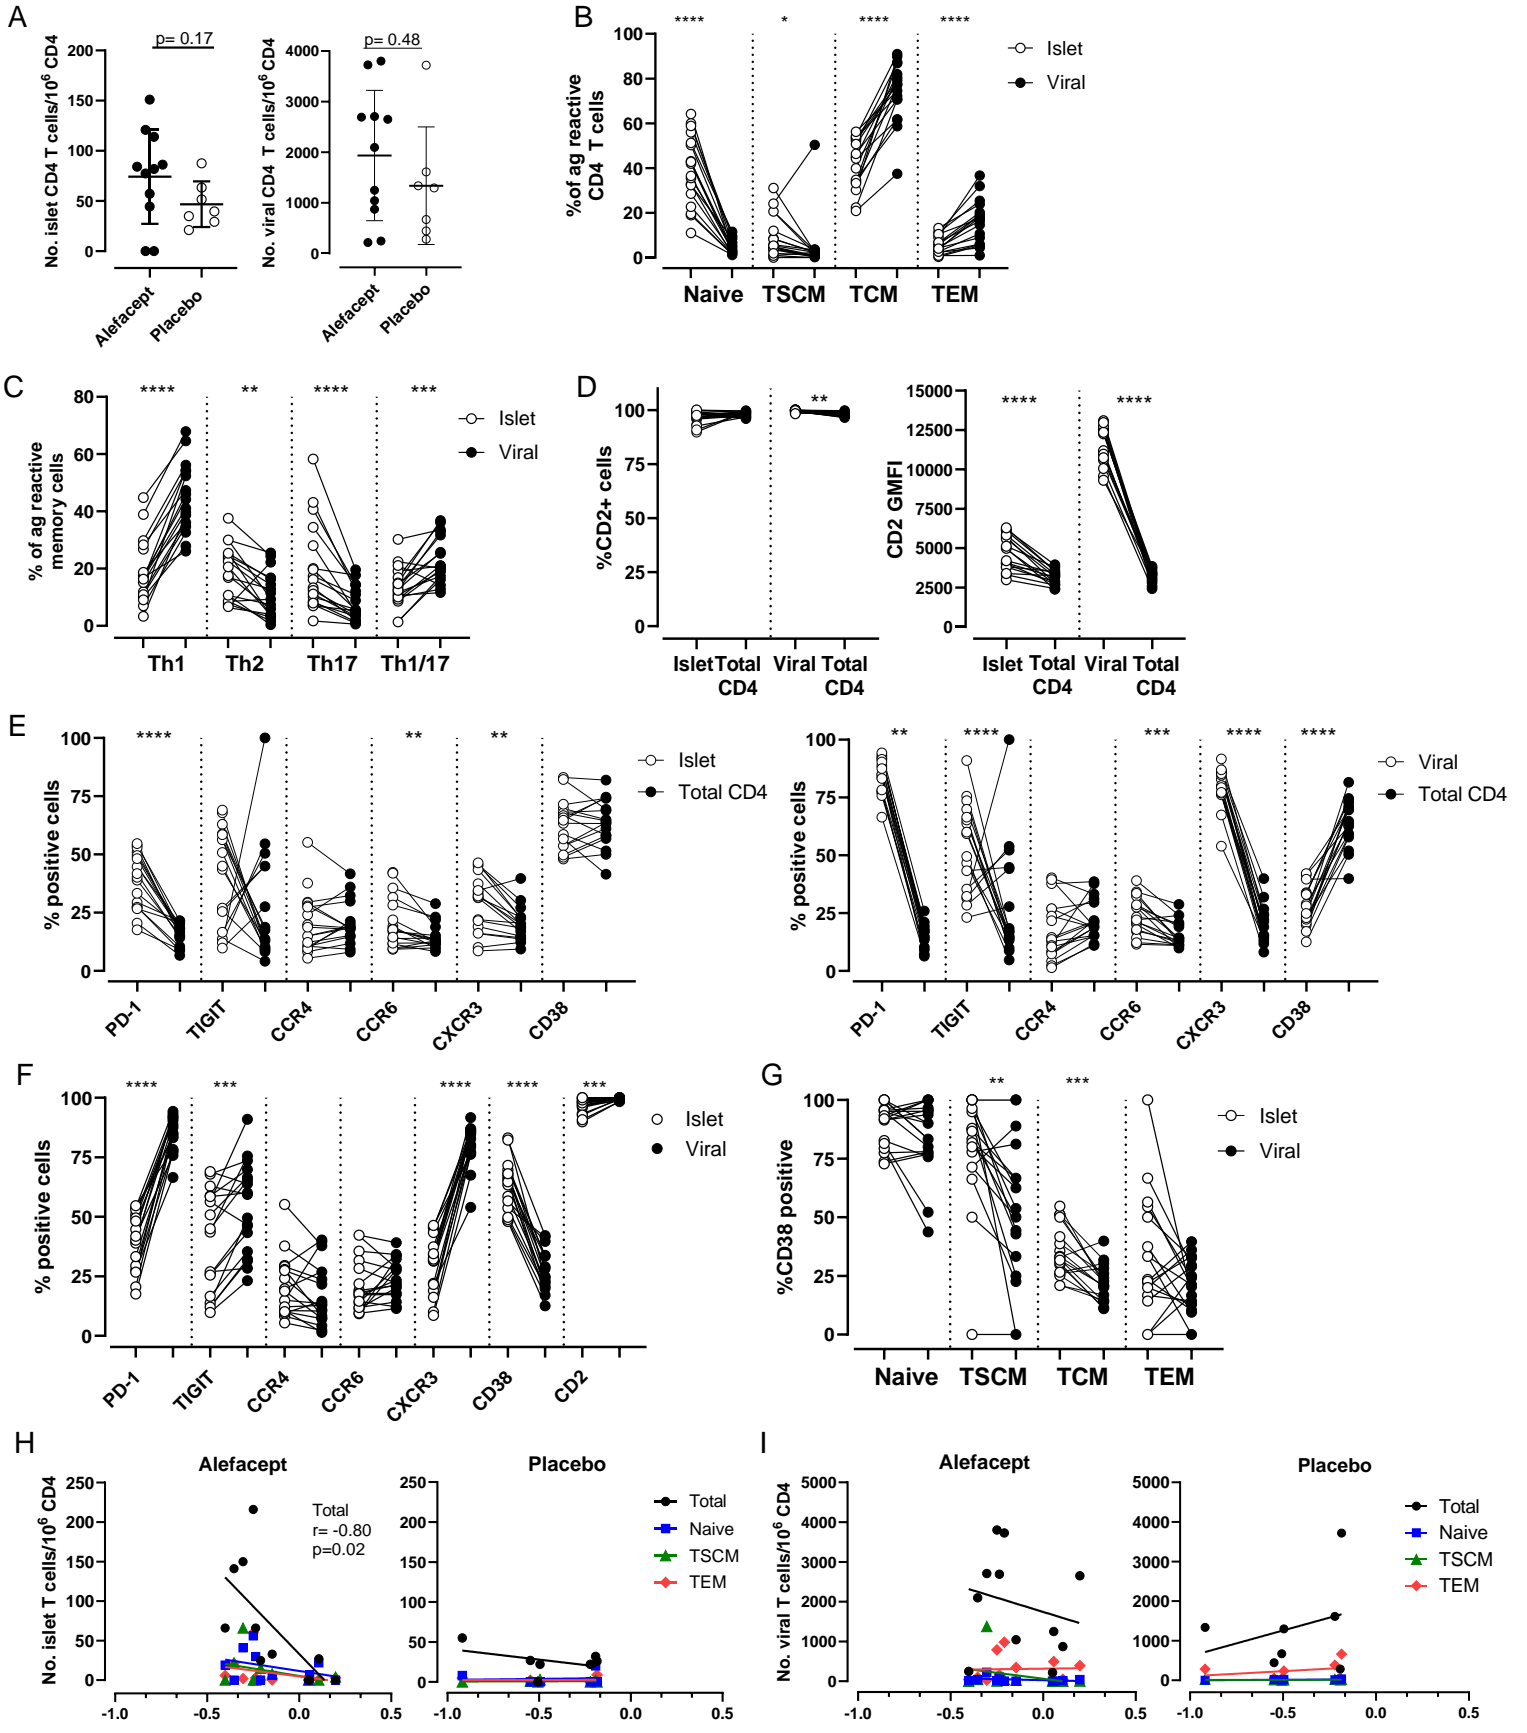

## Supplemental Figure 2

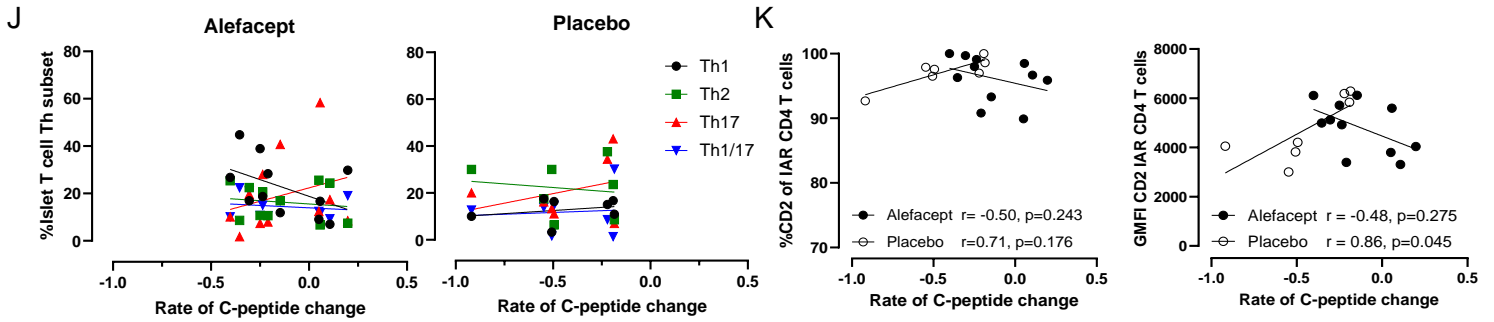

**Supplemental Figure 2.** (A) The number of IAR or viral reactive CD4 T cells per million total CD4 T cells in alefacept- (n=11) versus placebo-treated (n=7) subjects. Each symbol represents a unique subject. Graphs depict mean  $\pm$  SD. Significance was assessed using a Mann Whitney U test. (B) The frequency of naïve and memory populations in IAR CD4 T cells compared with viral reactive T cells per sample (n=18). (C) The frequency of Th subsets in IAR CD4 memory T cells compared with viral reactive T memory cells per sample (n=18). (D) The expression of CD2 on enriched IAR and viral antigen reactive CD4 T cells versus bulk CD4 T cells from the pre-enrichment sample from the same cultures, shown as the percent CD2+ antigen reactive or bulk CD4 T cells (left) and as CD2 GMFI (right) from all subjects (n=18). (E) The expression of individual surface markers on enriched IAR (left) or viral (right) reactive CD4 T cells compared with bulk CD4 T cells from the pre-enrichment sample from the same cultures (n=18 subjects) shown as the percent positive cells of the respective population. (F) Expression of surface markers on enriched IAR CD4 T cells compared with viral reactive T cells per sample (n=18). (G) Expression of CD38 on enriched IAR CD4 T cells compared with viral reactive T cells naïve and memory populations (n=18). (H) Correlation between the frequency of total, naïve, TSCM, and TEM IAR CD4 T cells per subject with the rate of C-peptide change in alefacept- (n=11) and placebo-treated subjects (n=7). Significant differences are noted in the graphs. (I) Correlation between the frequency of total, naïve, TSCM, and TEM viral reactive CD4 T cells per subject with the rate of C-peptide change in alefacept- and placebo-treated subjects. (J) Correlation between the frequency of memory IAR CD4 T cells with the indicated Th phenotypes with the rate of C-peptide change in alefacept (n=11) and placebo groups (n=7). (K) Correlation between the frequency of CD2+ IAR CD4 T cells (left) or CD2 GMFI on IAR CD4 T cells (right) with the rate of C-peptide change in alefacept (n=11) and placebo groups (n=7). Significant differences between populations in the graphs in B-G were determined using a Wilcoxon matched-pairs signed rank test with Benjamini-Hochberg adjustment and are indicated by asterisks, \* $P < 0.05$ , \*\* $P < 0.01$ , \*\*\* $P < 0.001$ , \*\*\*\* $P < 0.0001$ . Correlations in the graphs in H-K were performed using a Spearman rho test and P values were adjusted using Benjamini-Hochberg adjustment.

# Supplemental Figure 3

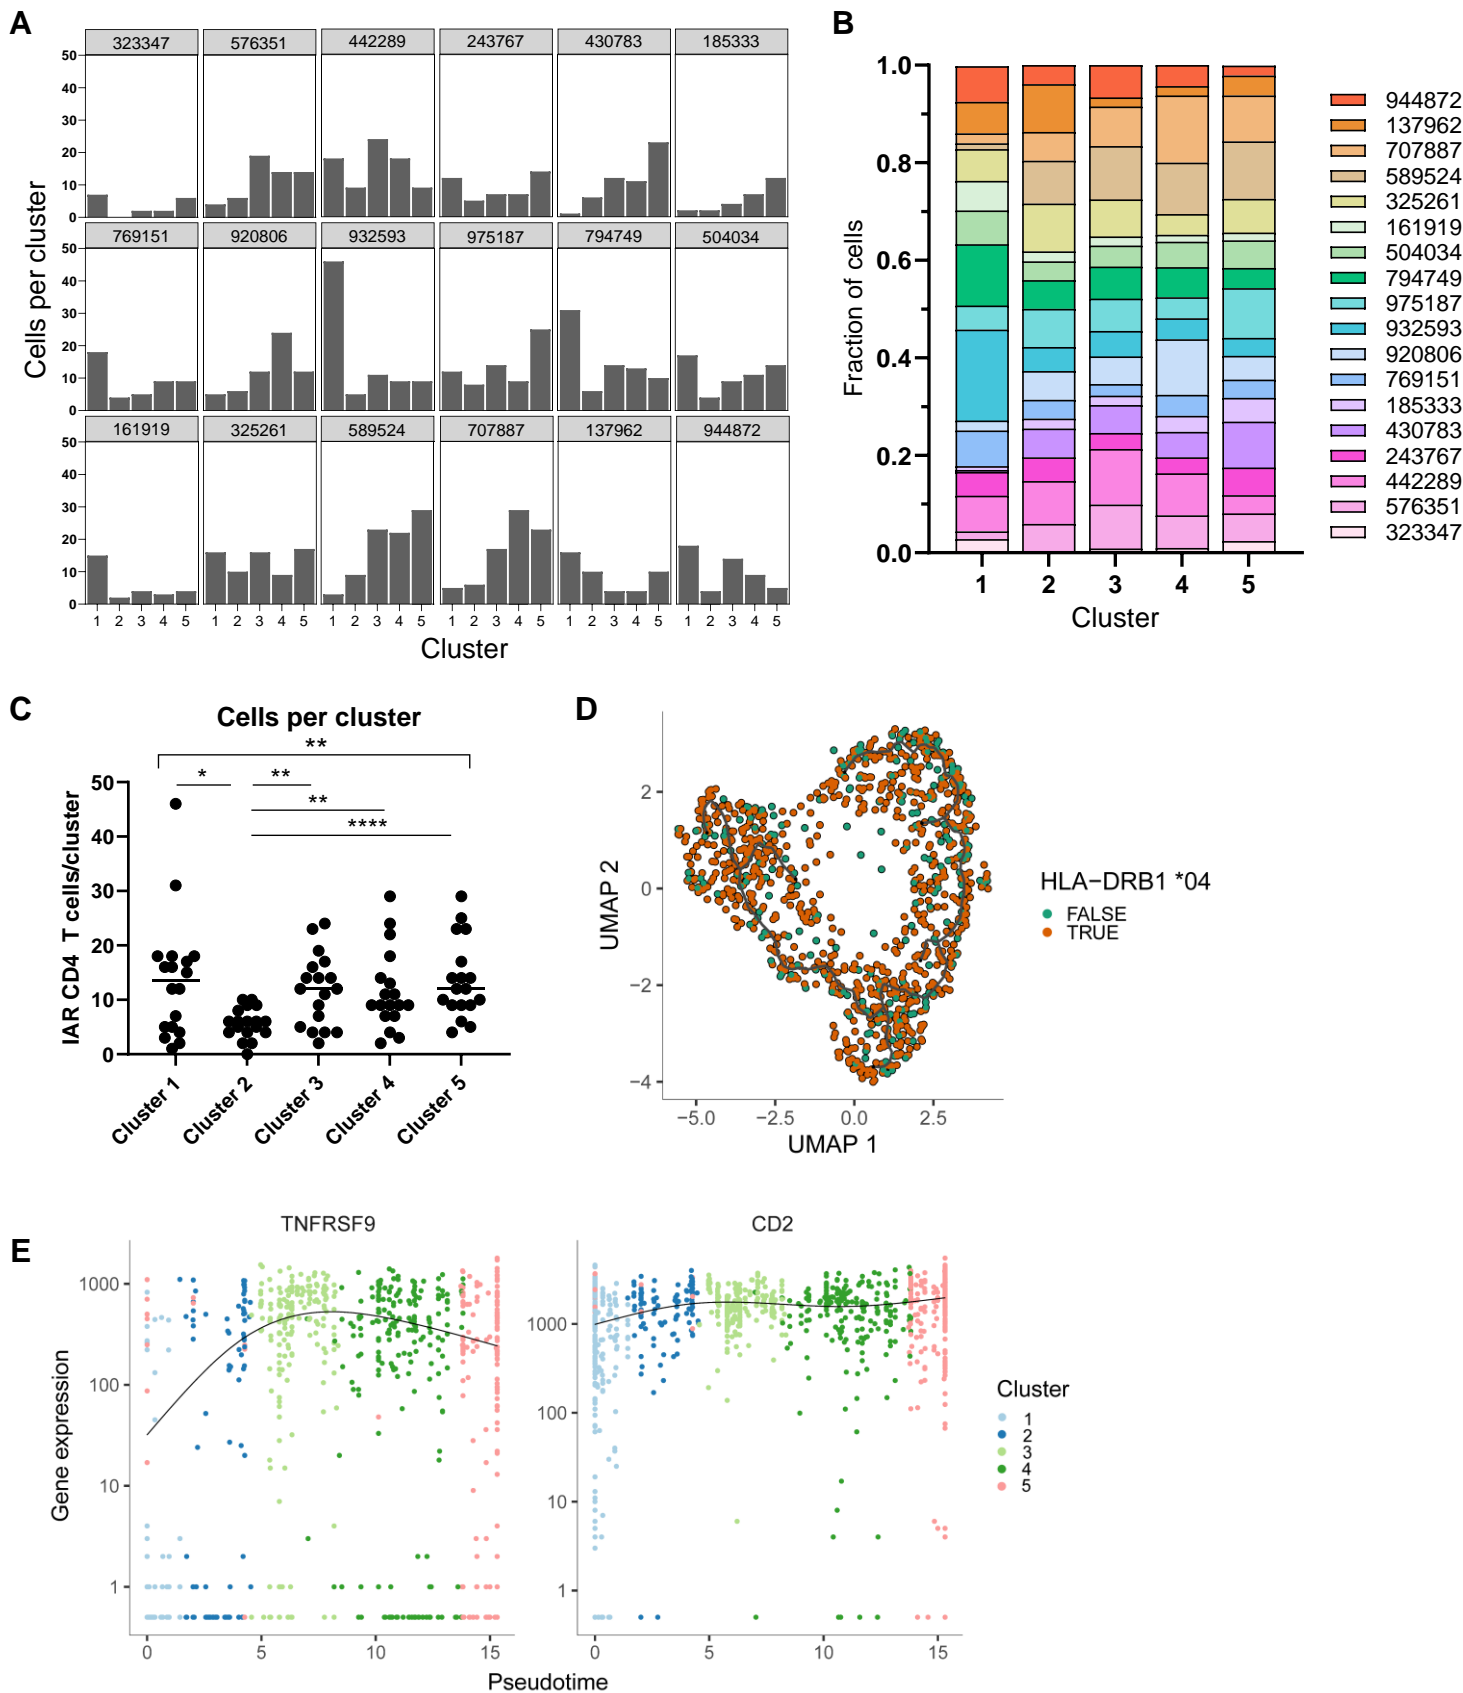

**Supplemental Figure 3.** (A) The distribution of IAR CD4 T cells in Monocle Clusters 1-5 in each T1DAL participant in this study. Subject IDs are indicated at the top of each graph. (B) The fraction of each Monocle cluster composed of cells from each donor in the study. (C) Comparison of the distributions of IAR CD4 T cells between Monocle clusters. Variance across clusters was determined using a Kruskal Wallis test; two-group comparisons were made using a Mann Whitney U test. \* $P < 0.05$ , \*\* $P < 0.01$ , \*\*\*\* $P < 0.0001$ . (D) Monocle 3 pseudotime trajectory of IAR CD4 T cells colored by donor HLA DRB1\*04 status, showing no bias in cell clustering by HLA. (E) Pseudotime plots showing high levels of transcripts for TNFRSF9 (CD137) and CD2 in Monocle Cluster 3.

# Supplemental Figure 4

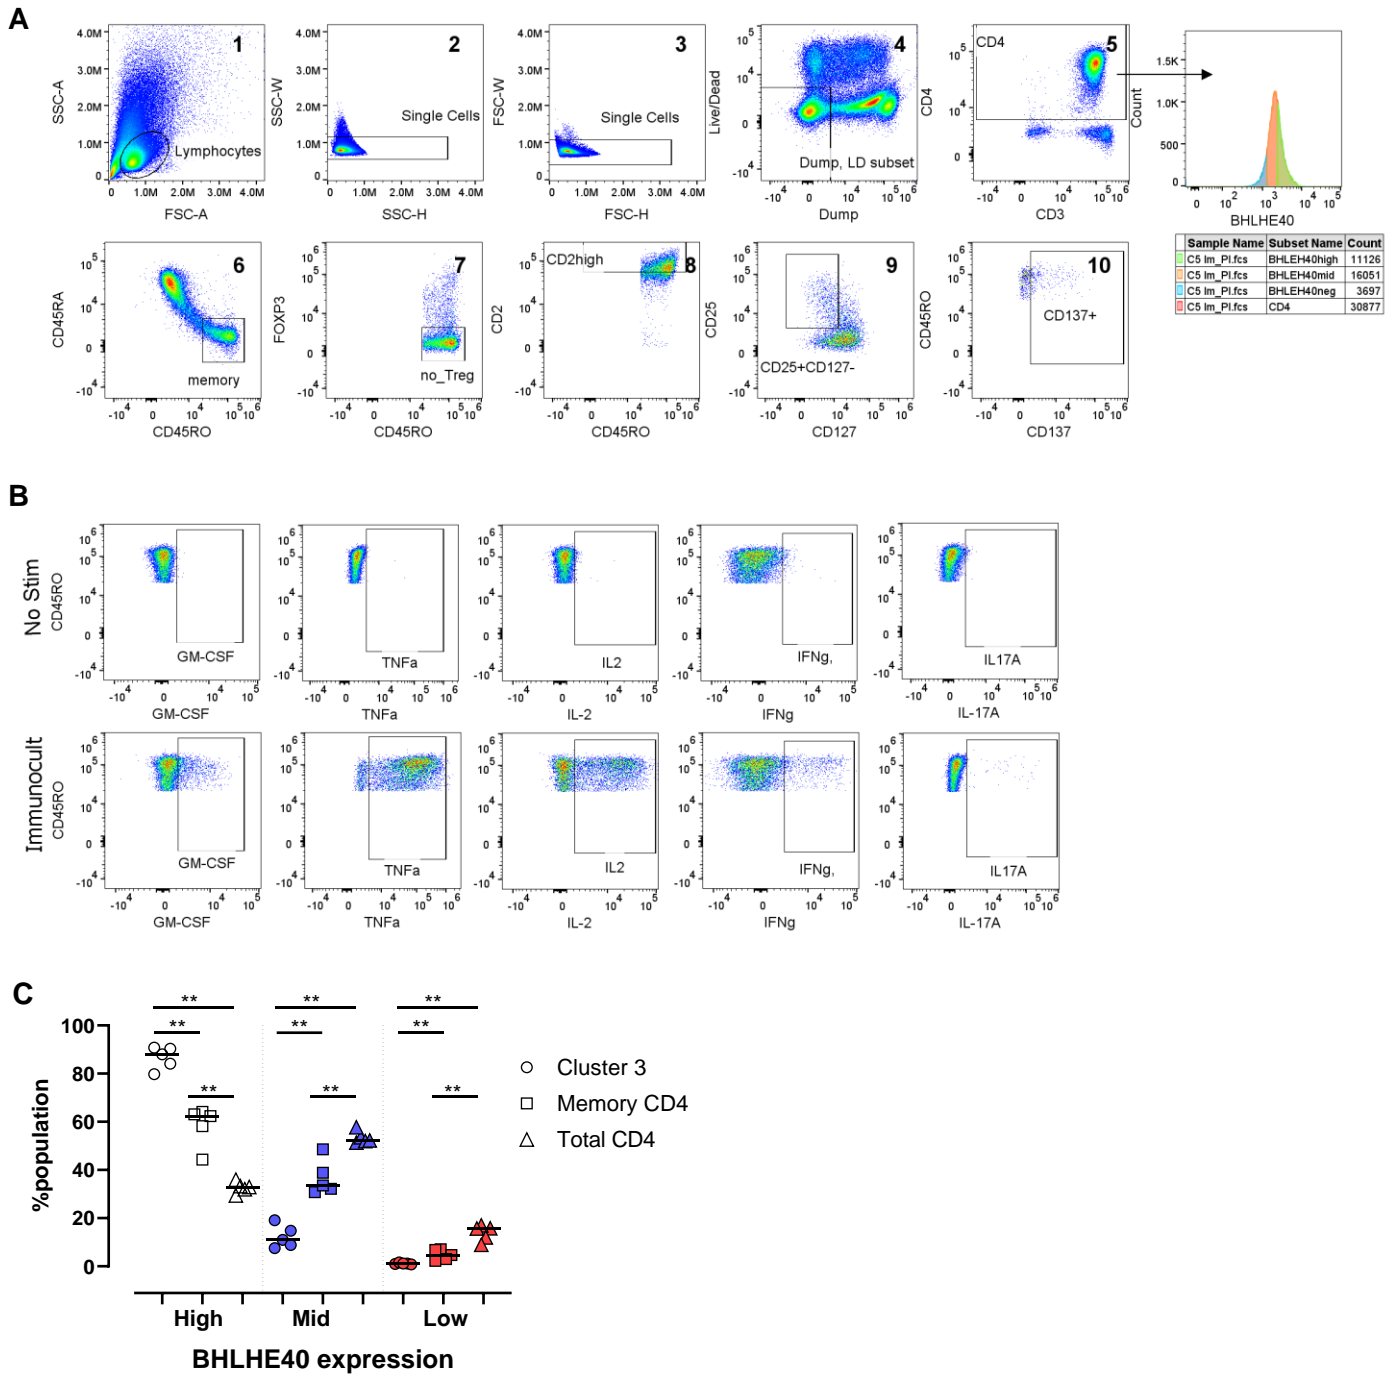

**Supplemental Figure 4.** Identification of Cluster 3-like CD4 T cells by flow cytometry and analysis of intracellular cytokine expression. (A) Gating strategy to identify Cluster 3-like CD4 T cells expressing low and high levels of BHLHE40. (B) Gates for intracellular cytokine expression were set using CD4 memory T cells from cultures that were not stimulated with anti-CD3/anti-CD28 antibodies (Immunocult) and copied onto Cluster 3-like cells. (C) Two-way comparisons of the frequency of cells expressing high, mid, or low levels of BHLHE40 amongst CD4 T cells with Cluster 3 phenotype, CD4 memory T cells, and total CD4 T cells as shown in Figure 4D,  $n=5$  T1D subjects. Significance was assessed using Mann Whitney U tests with Benjamini-Hochberg adjustment for multiple testing,  $**P < 0.01$ .
